# Supplementary material for: Electron dopable molecular wires based on the extended viologens
Source: Royal Society of Chemistry journal article supplement (doi:10.1039/c1cp20652d), 2011-01-01
Supplement: c1cp20652d.doc [file c1cp20652d.doc]

Supplement 1

Cyclic voltammograms of extended viologens **1** to **6** in the potential range from –0.7V to –2.5V against ferrocene/ferrocenium redox couple.


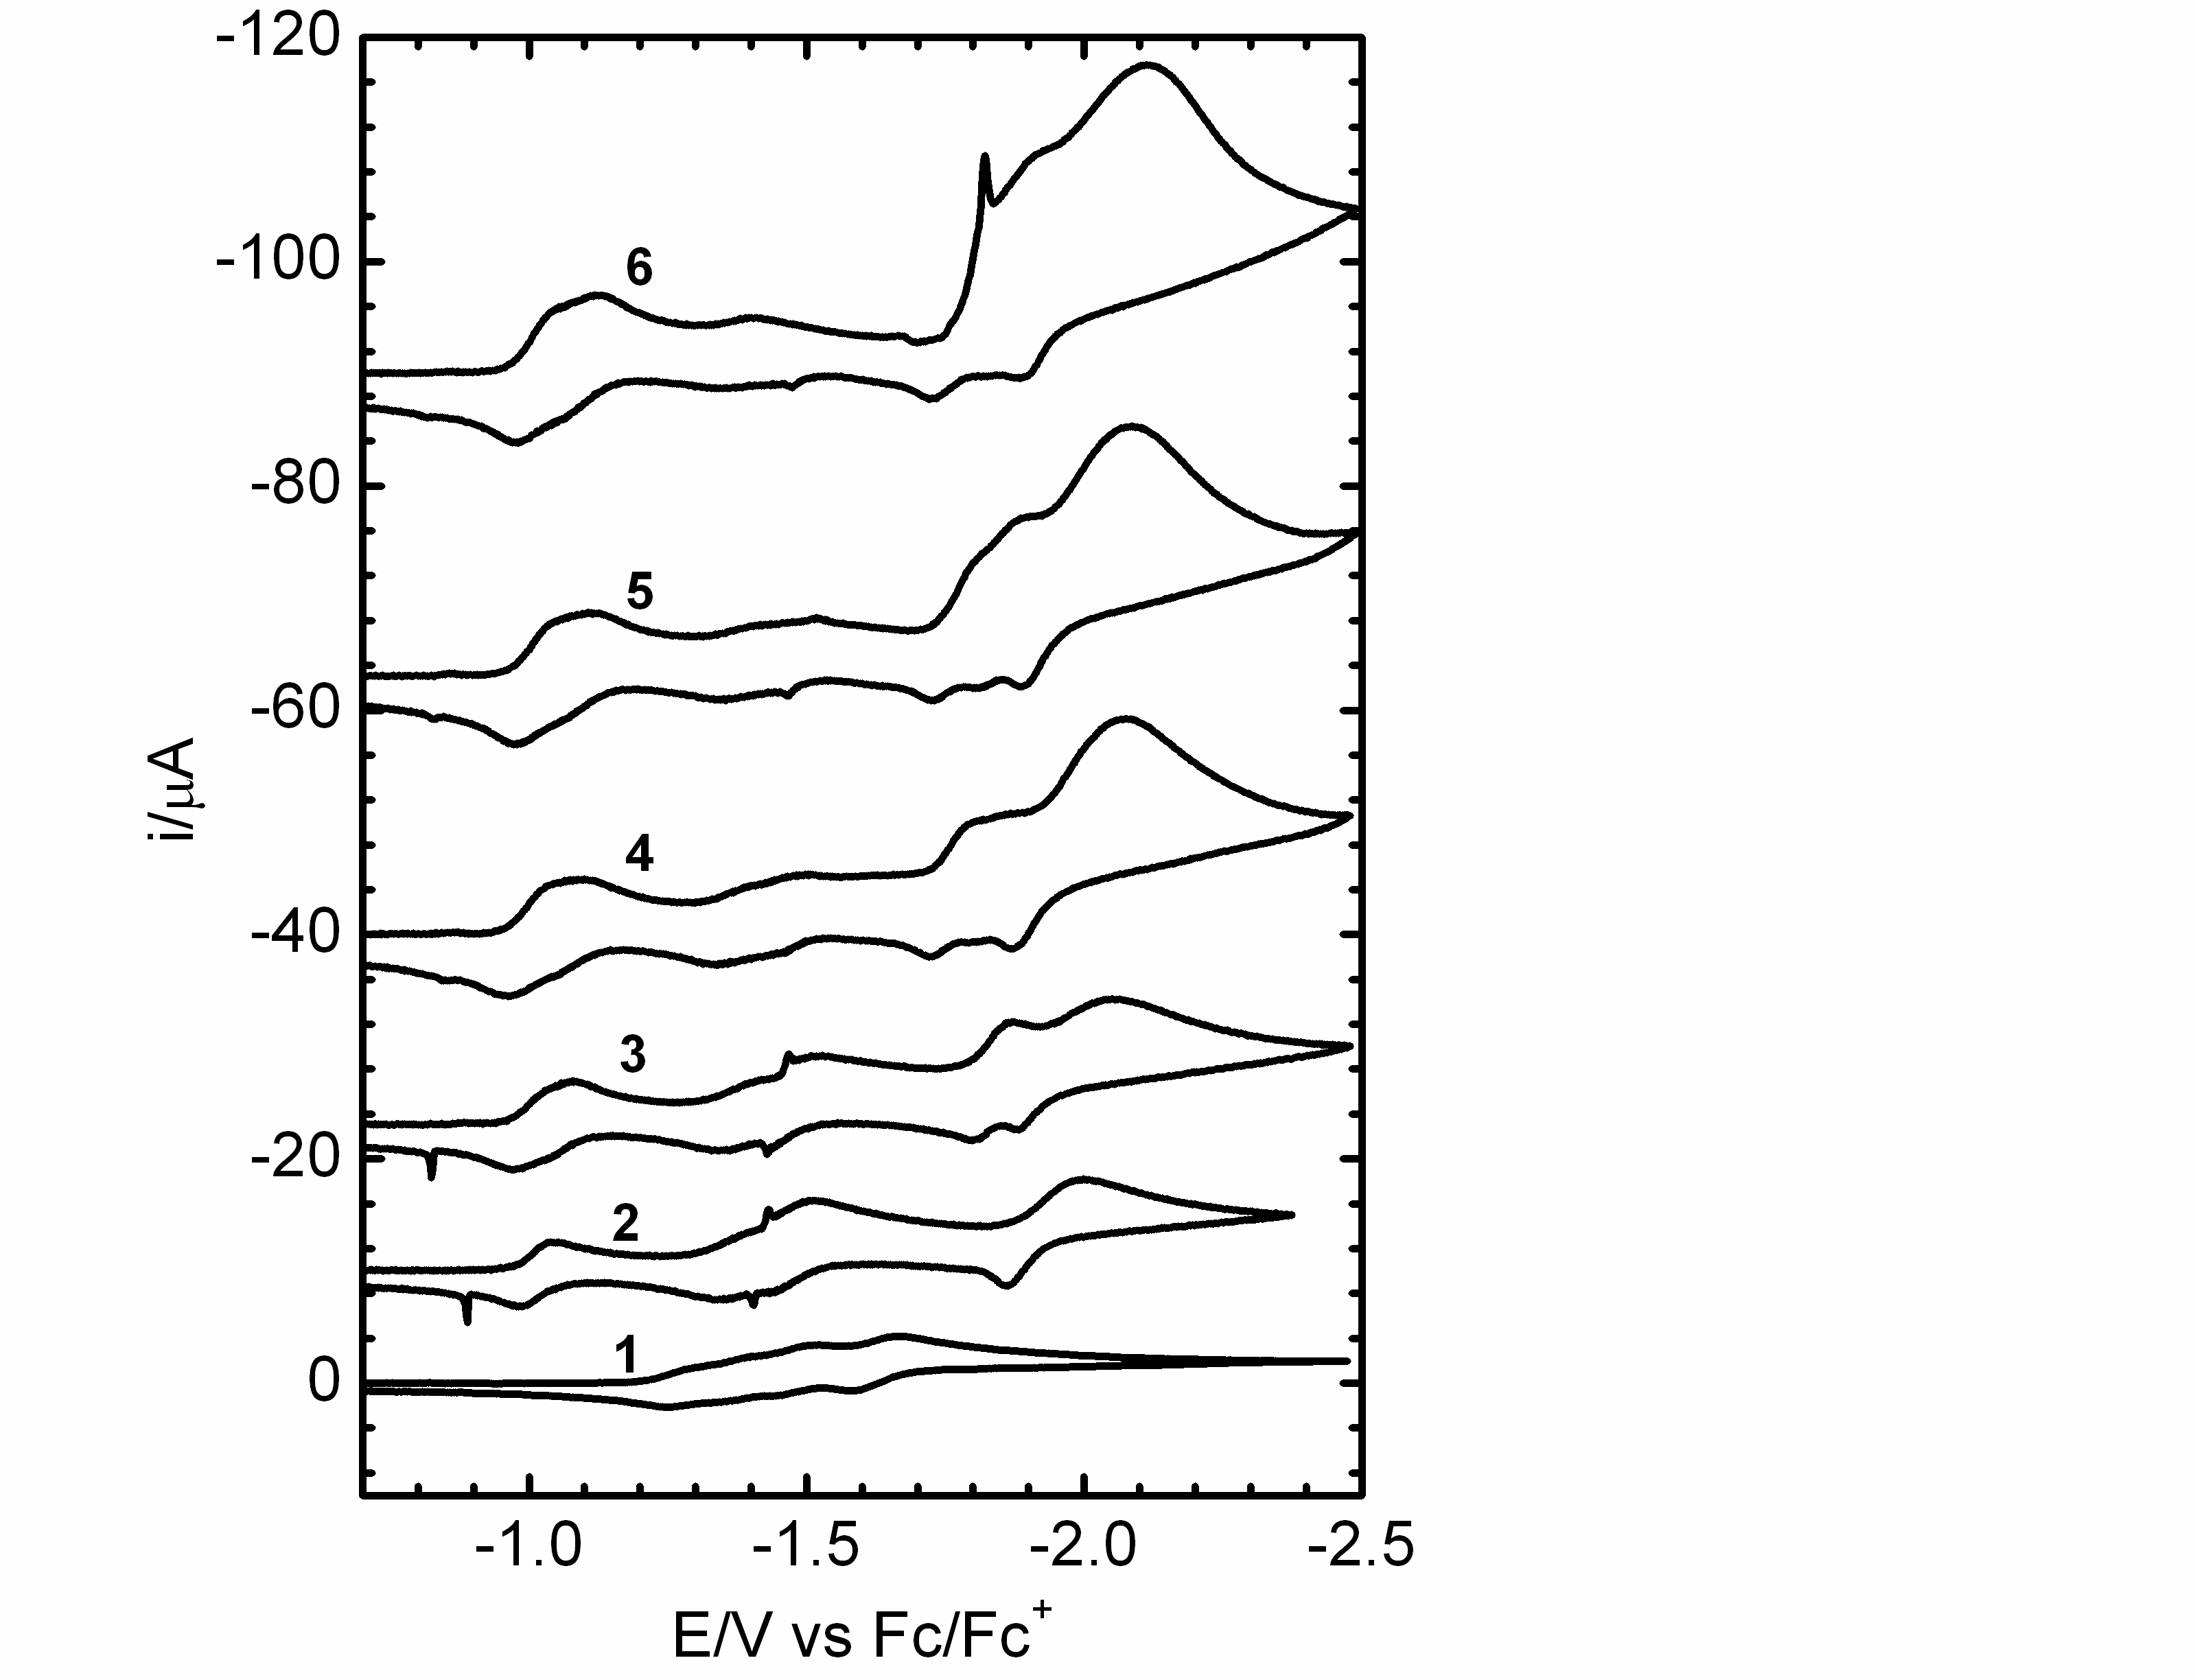


*Figure S1* Cyclic voltammogram of 1×10–3 M extended viologen compound in DMSO, containing 0.1 M TBAPF6 as the supporting electrolyte, obtained at scan rate 0.25 V/s on the hanging mercury drop electrode. Labels 1 to 6 indicate the compound used. Current–voltage curves are shifted vertically for better visualization. Originally, they have the same charging current value at the starting potential –0.7V against the Fc/Fc+ couple.

Supplement 2

Logarithmic analysis of the DC polarograms shown in Figure 1 of the main text.


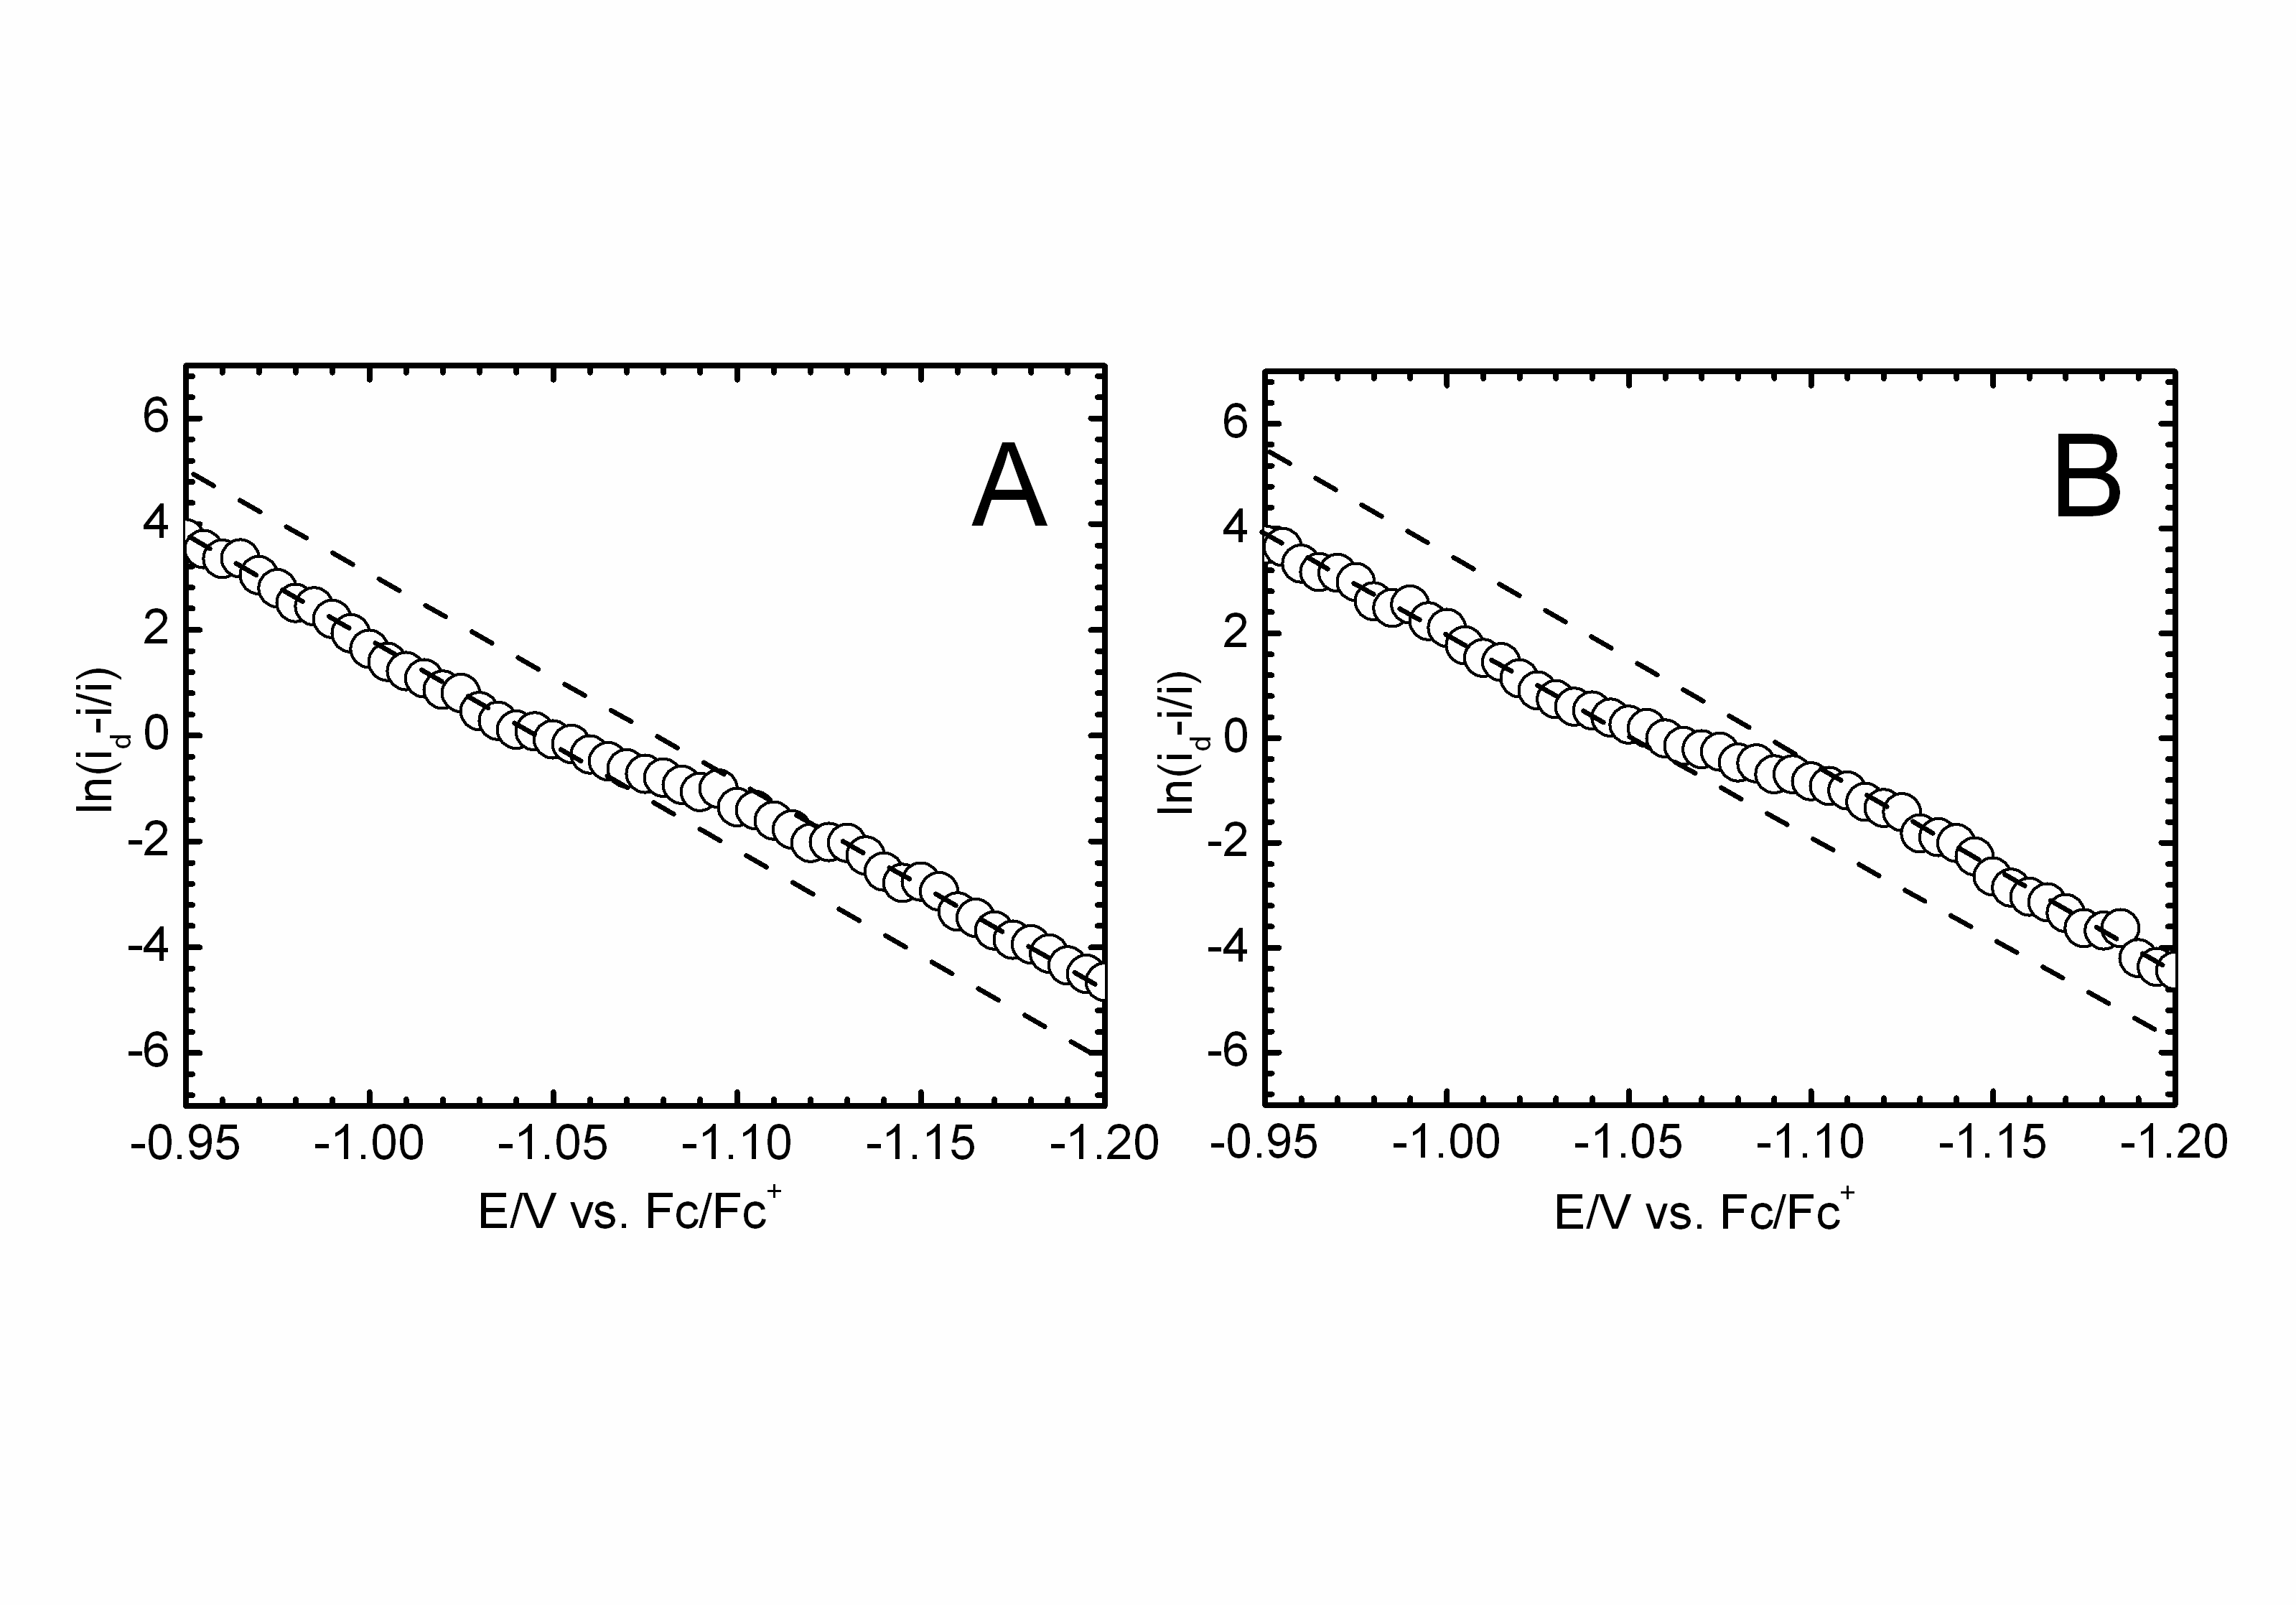


*Figure S2* Log–plot analysis of the merged polarographic waves of **4** (A) and **6** (B) obtained from the DC polarograms shown in Figure 1A of the main text.
